# Supplementary material
Source: PubMed Central journal article supplement (PMC5687837)
Supplement: NIHMS912922-supplement.pdf [file NIHMS912922-supplement.pdf]

A

High pericyte coverage  
(GBM1021394)

Low pericyte coverage  
(GBM1117383)

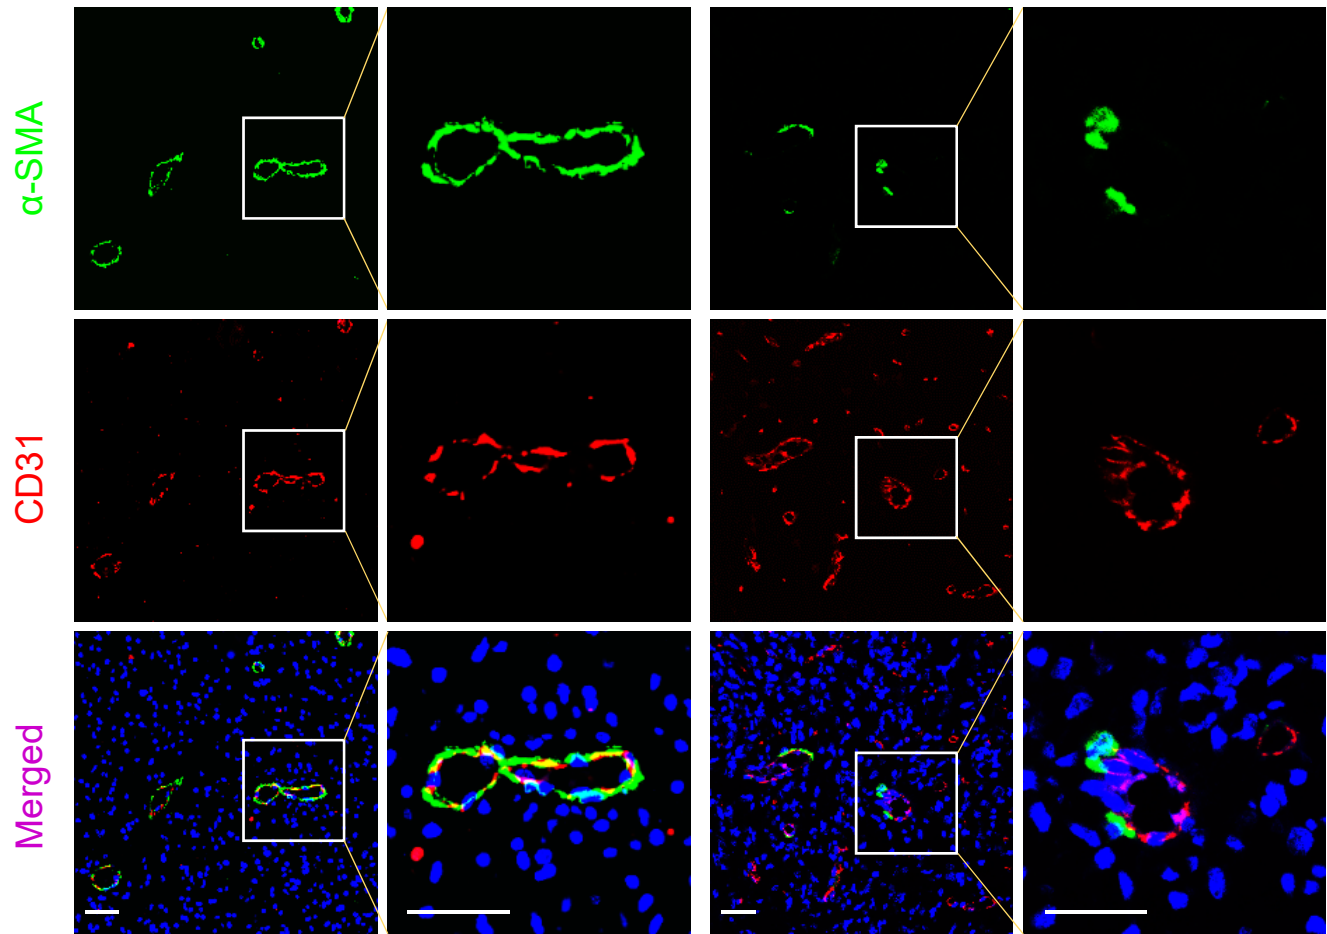

B

CD31

CD34

CD31 CD34 DAPI

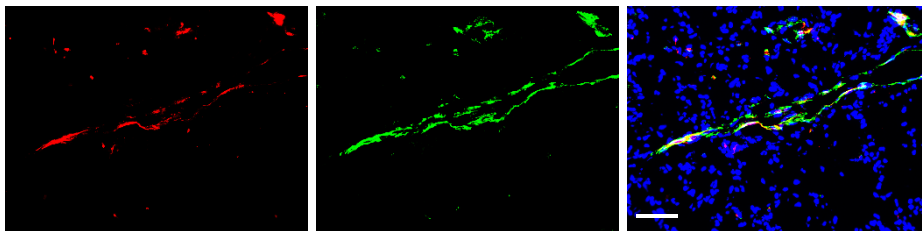

C

CD31

CD34

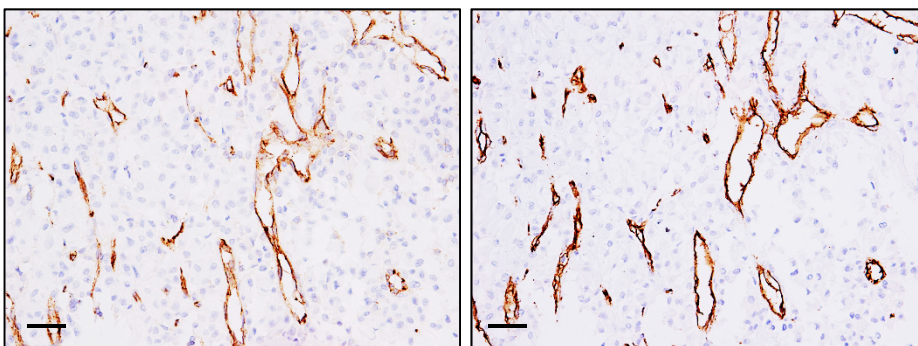

D

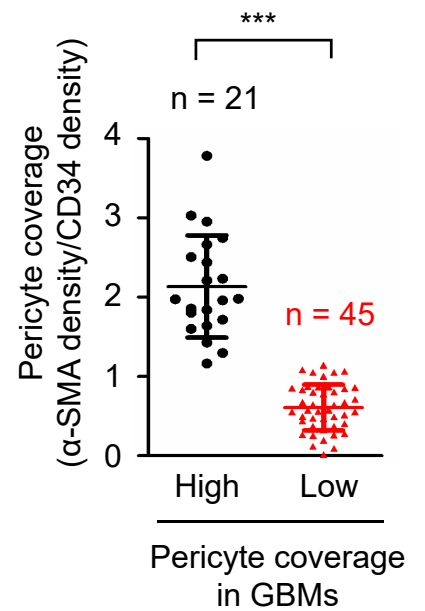

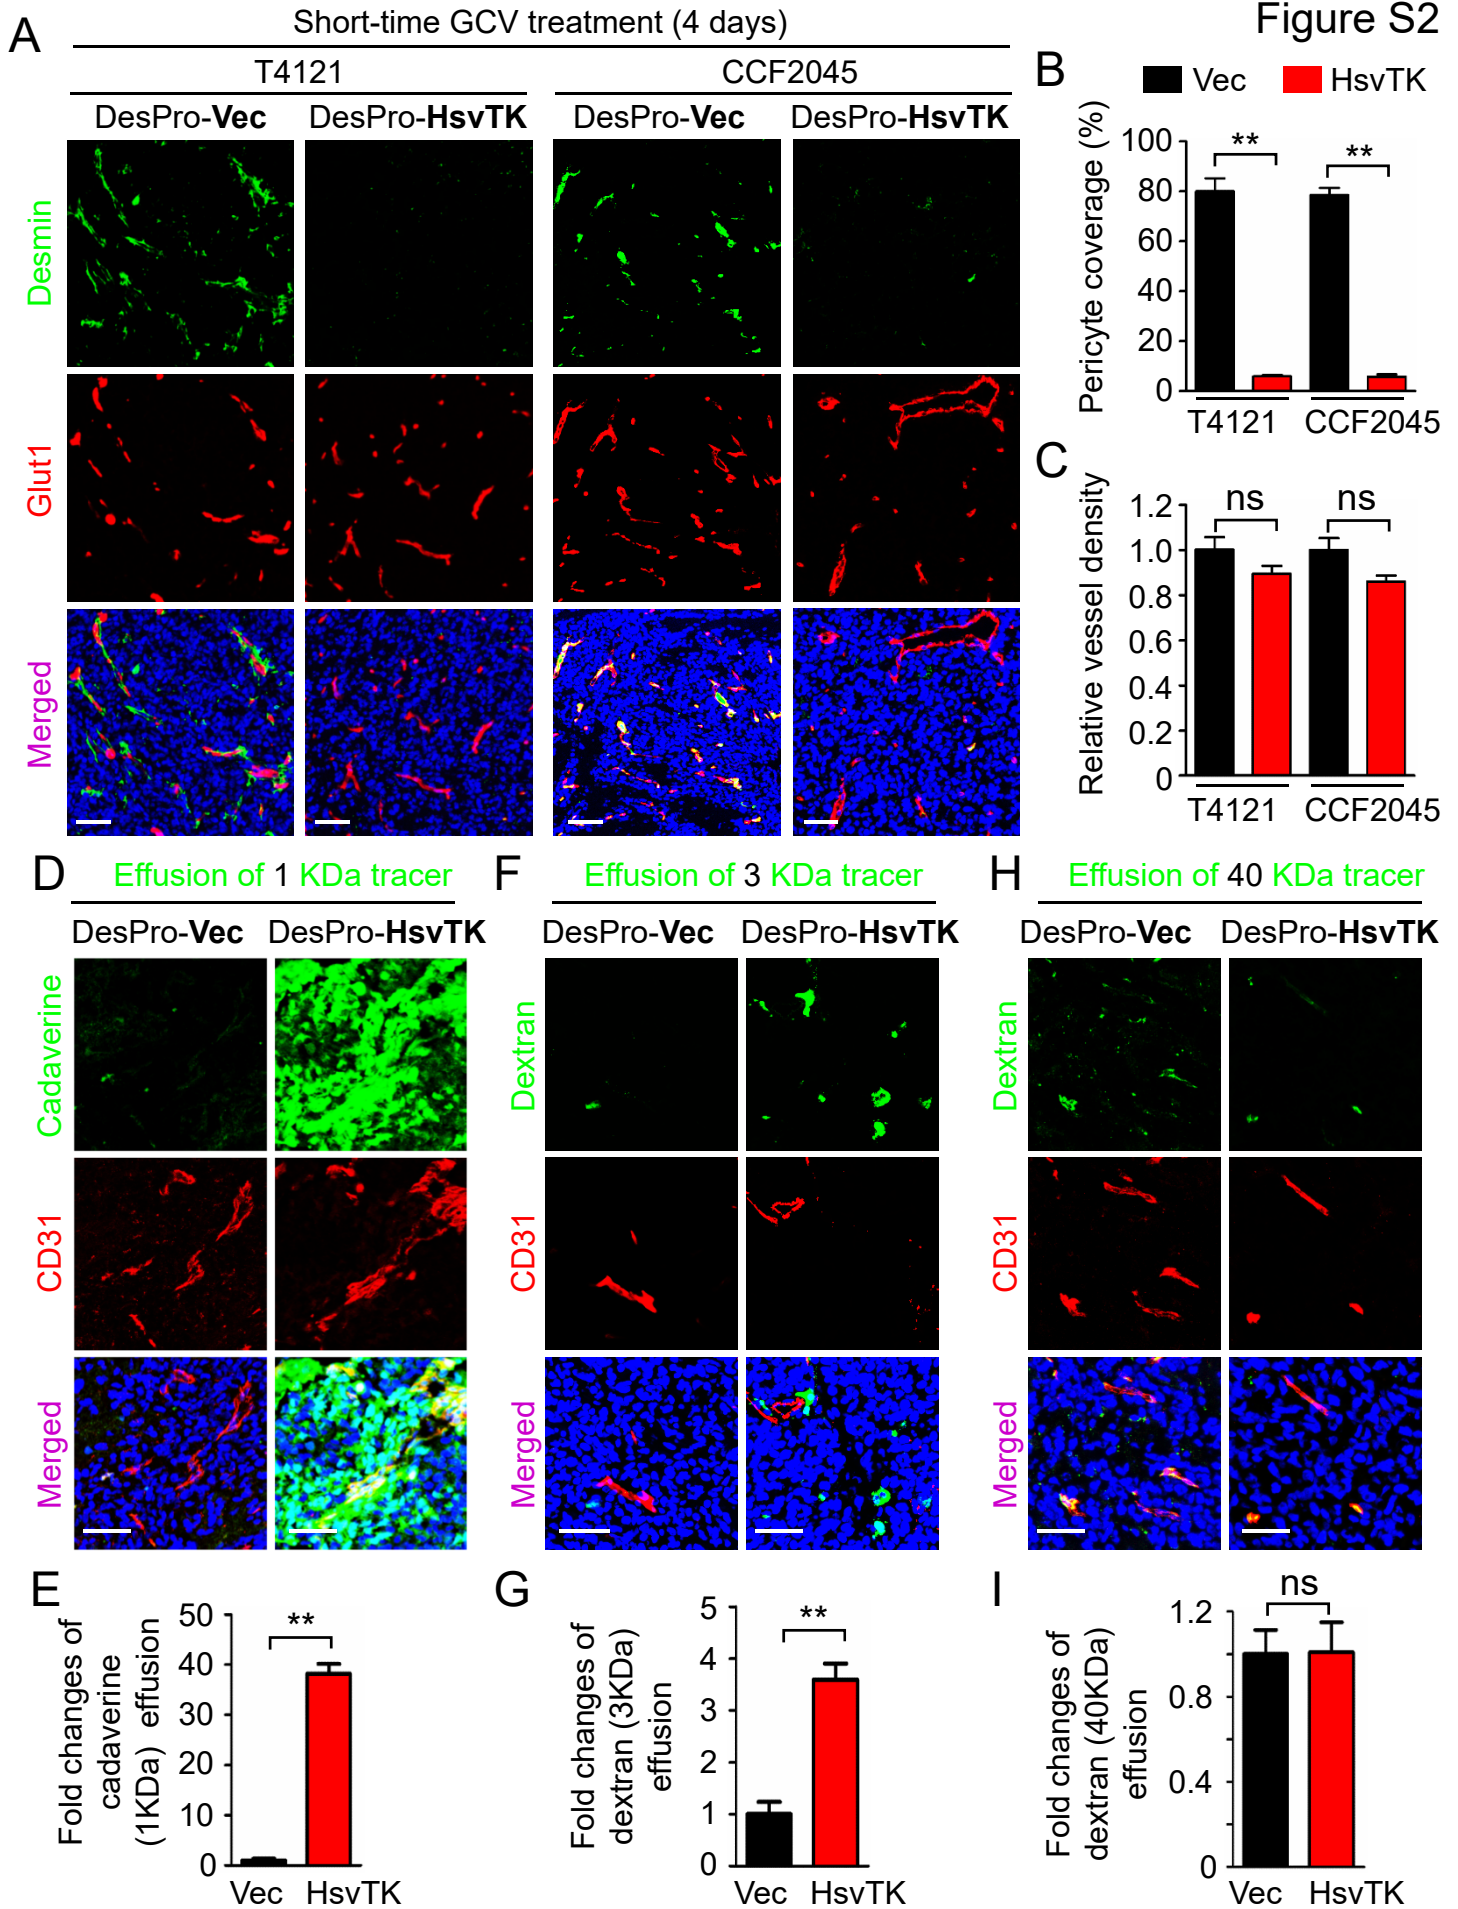

Figure S3

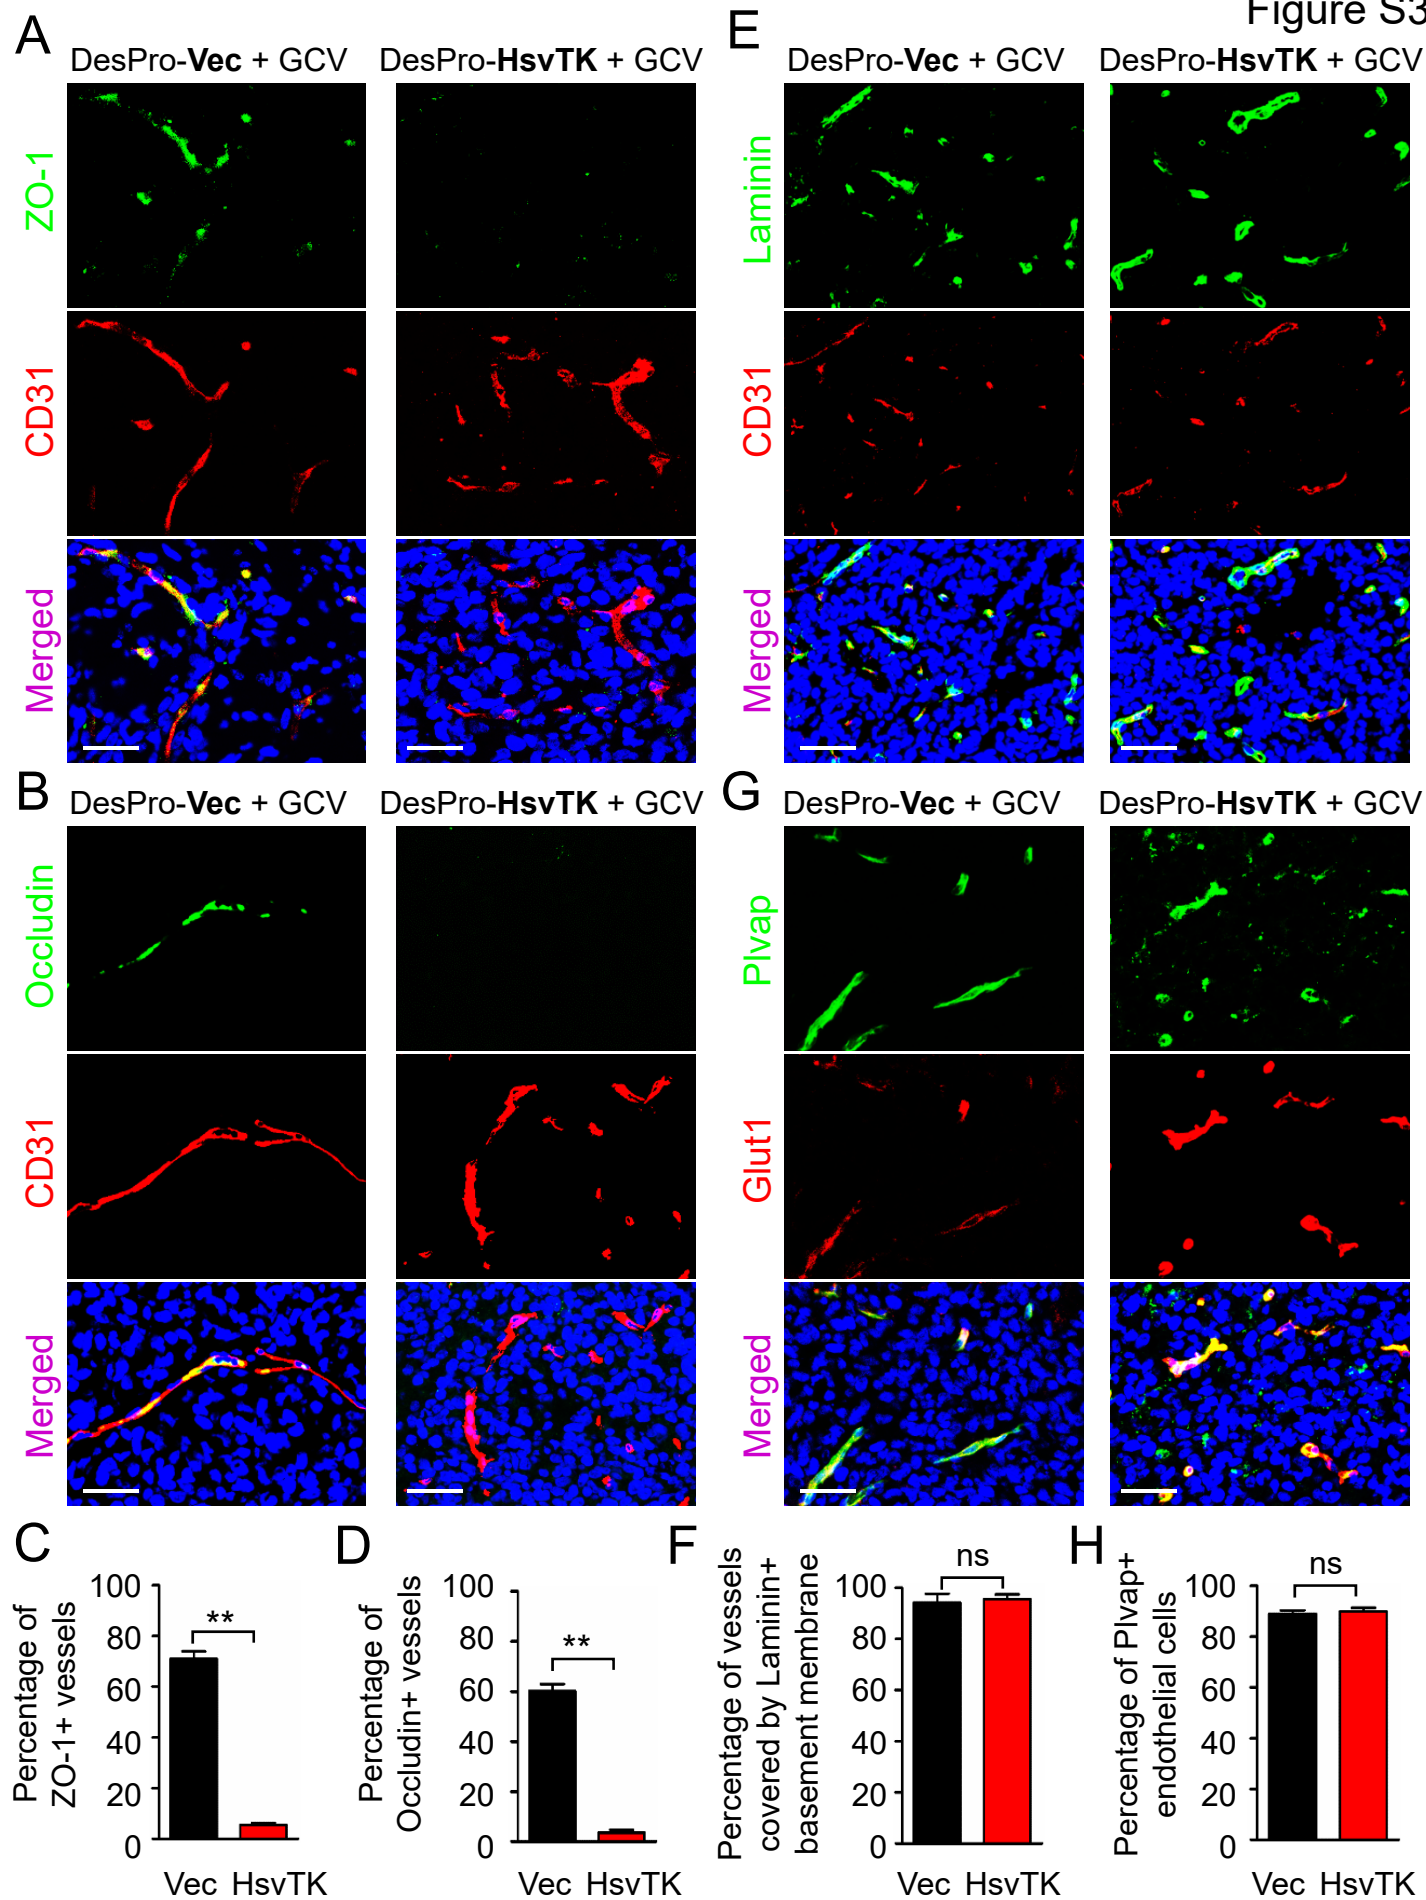

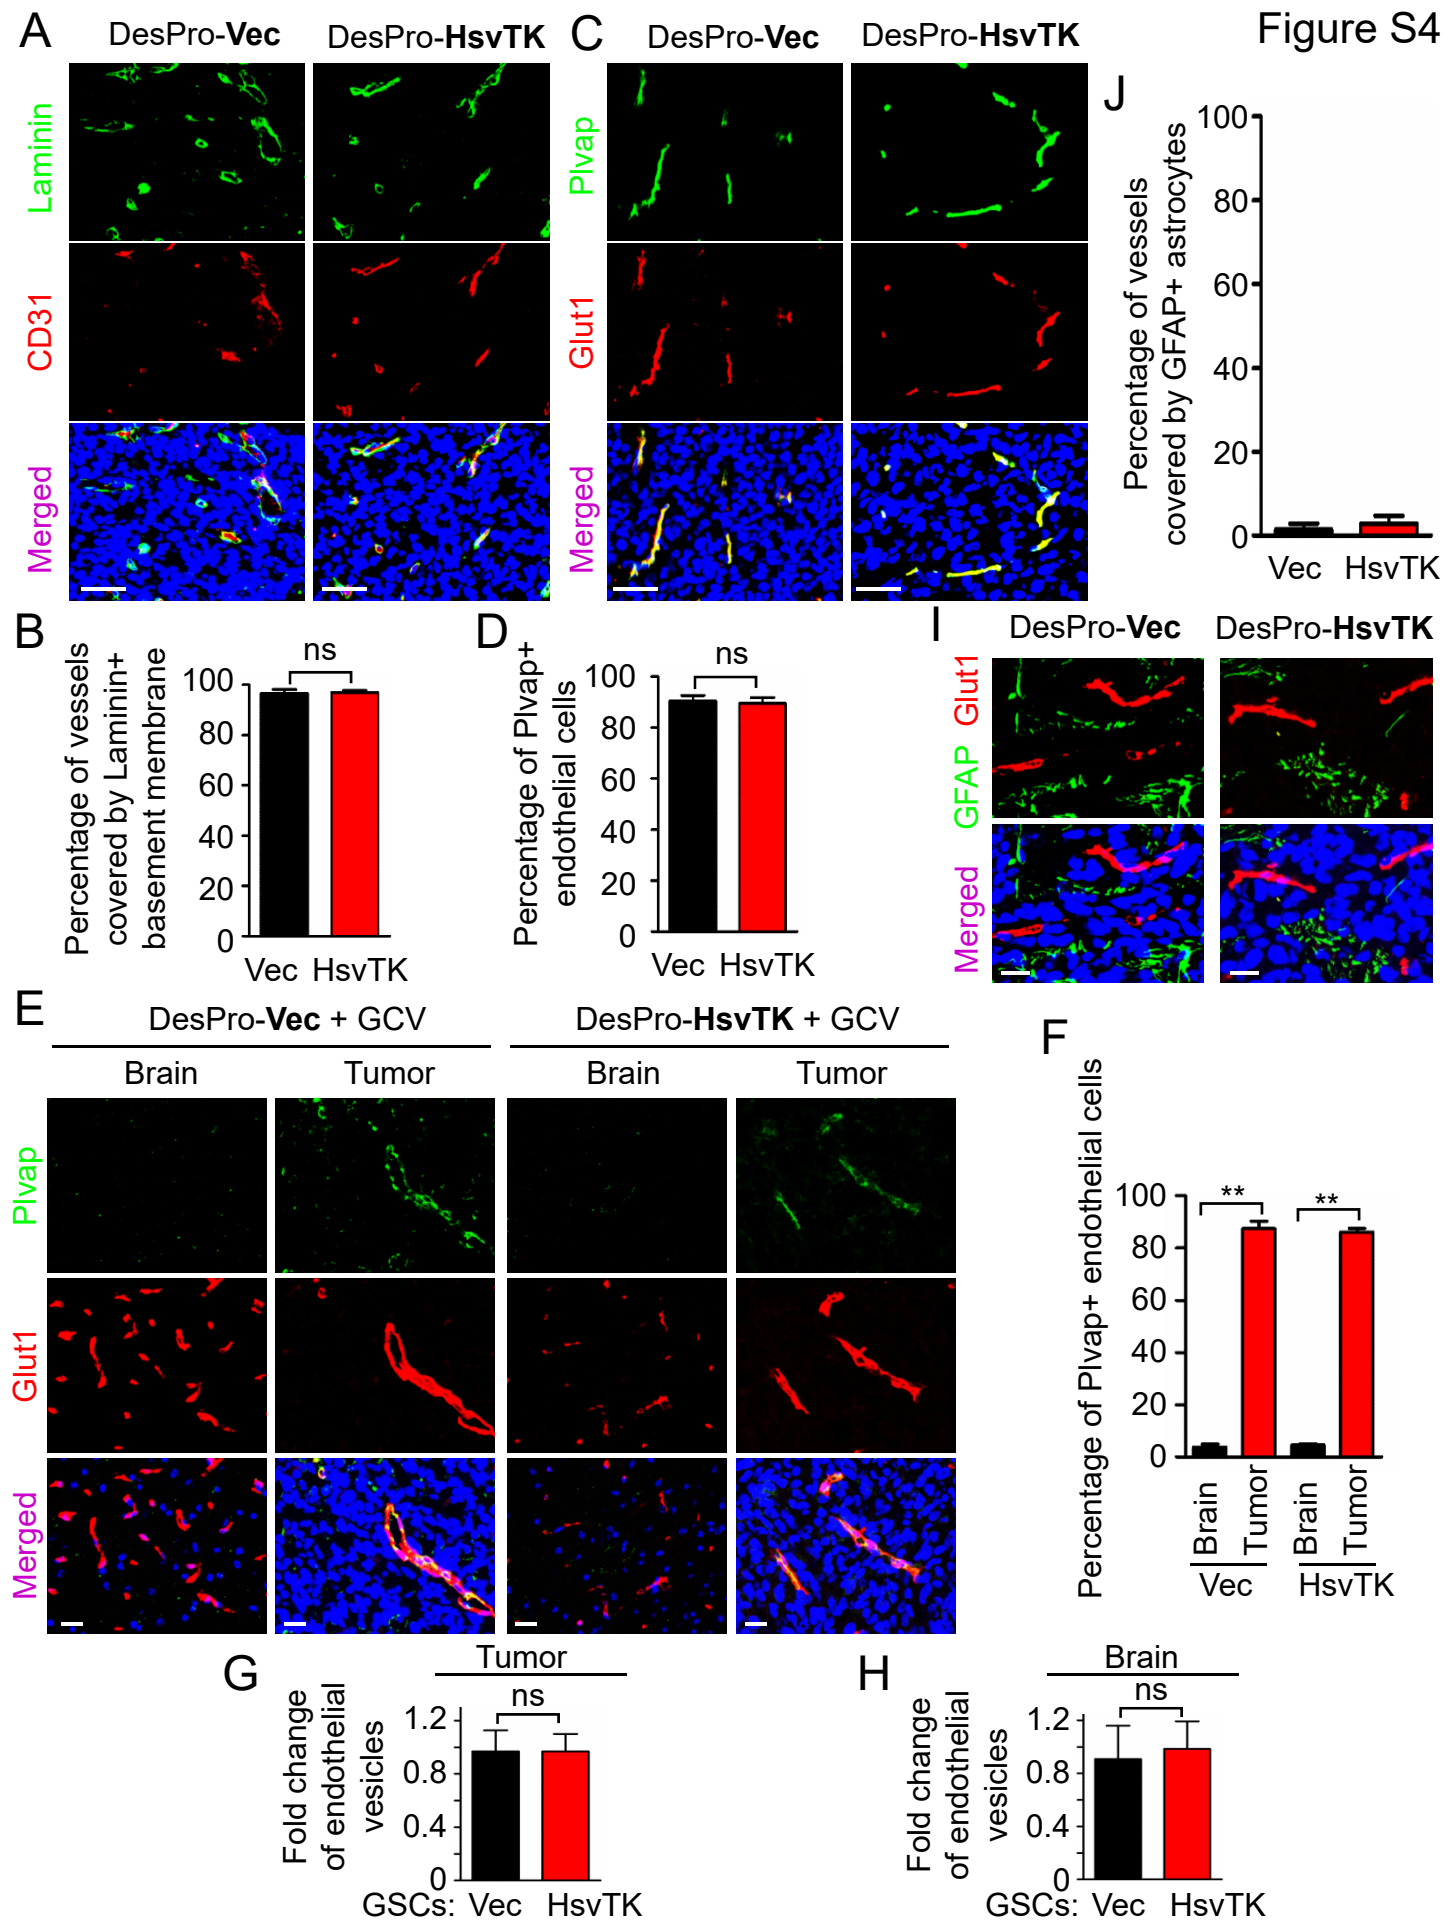

Figure S5

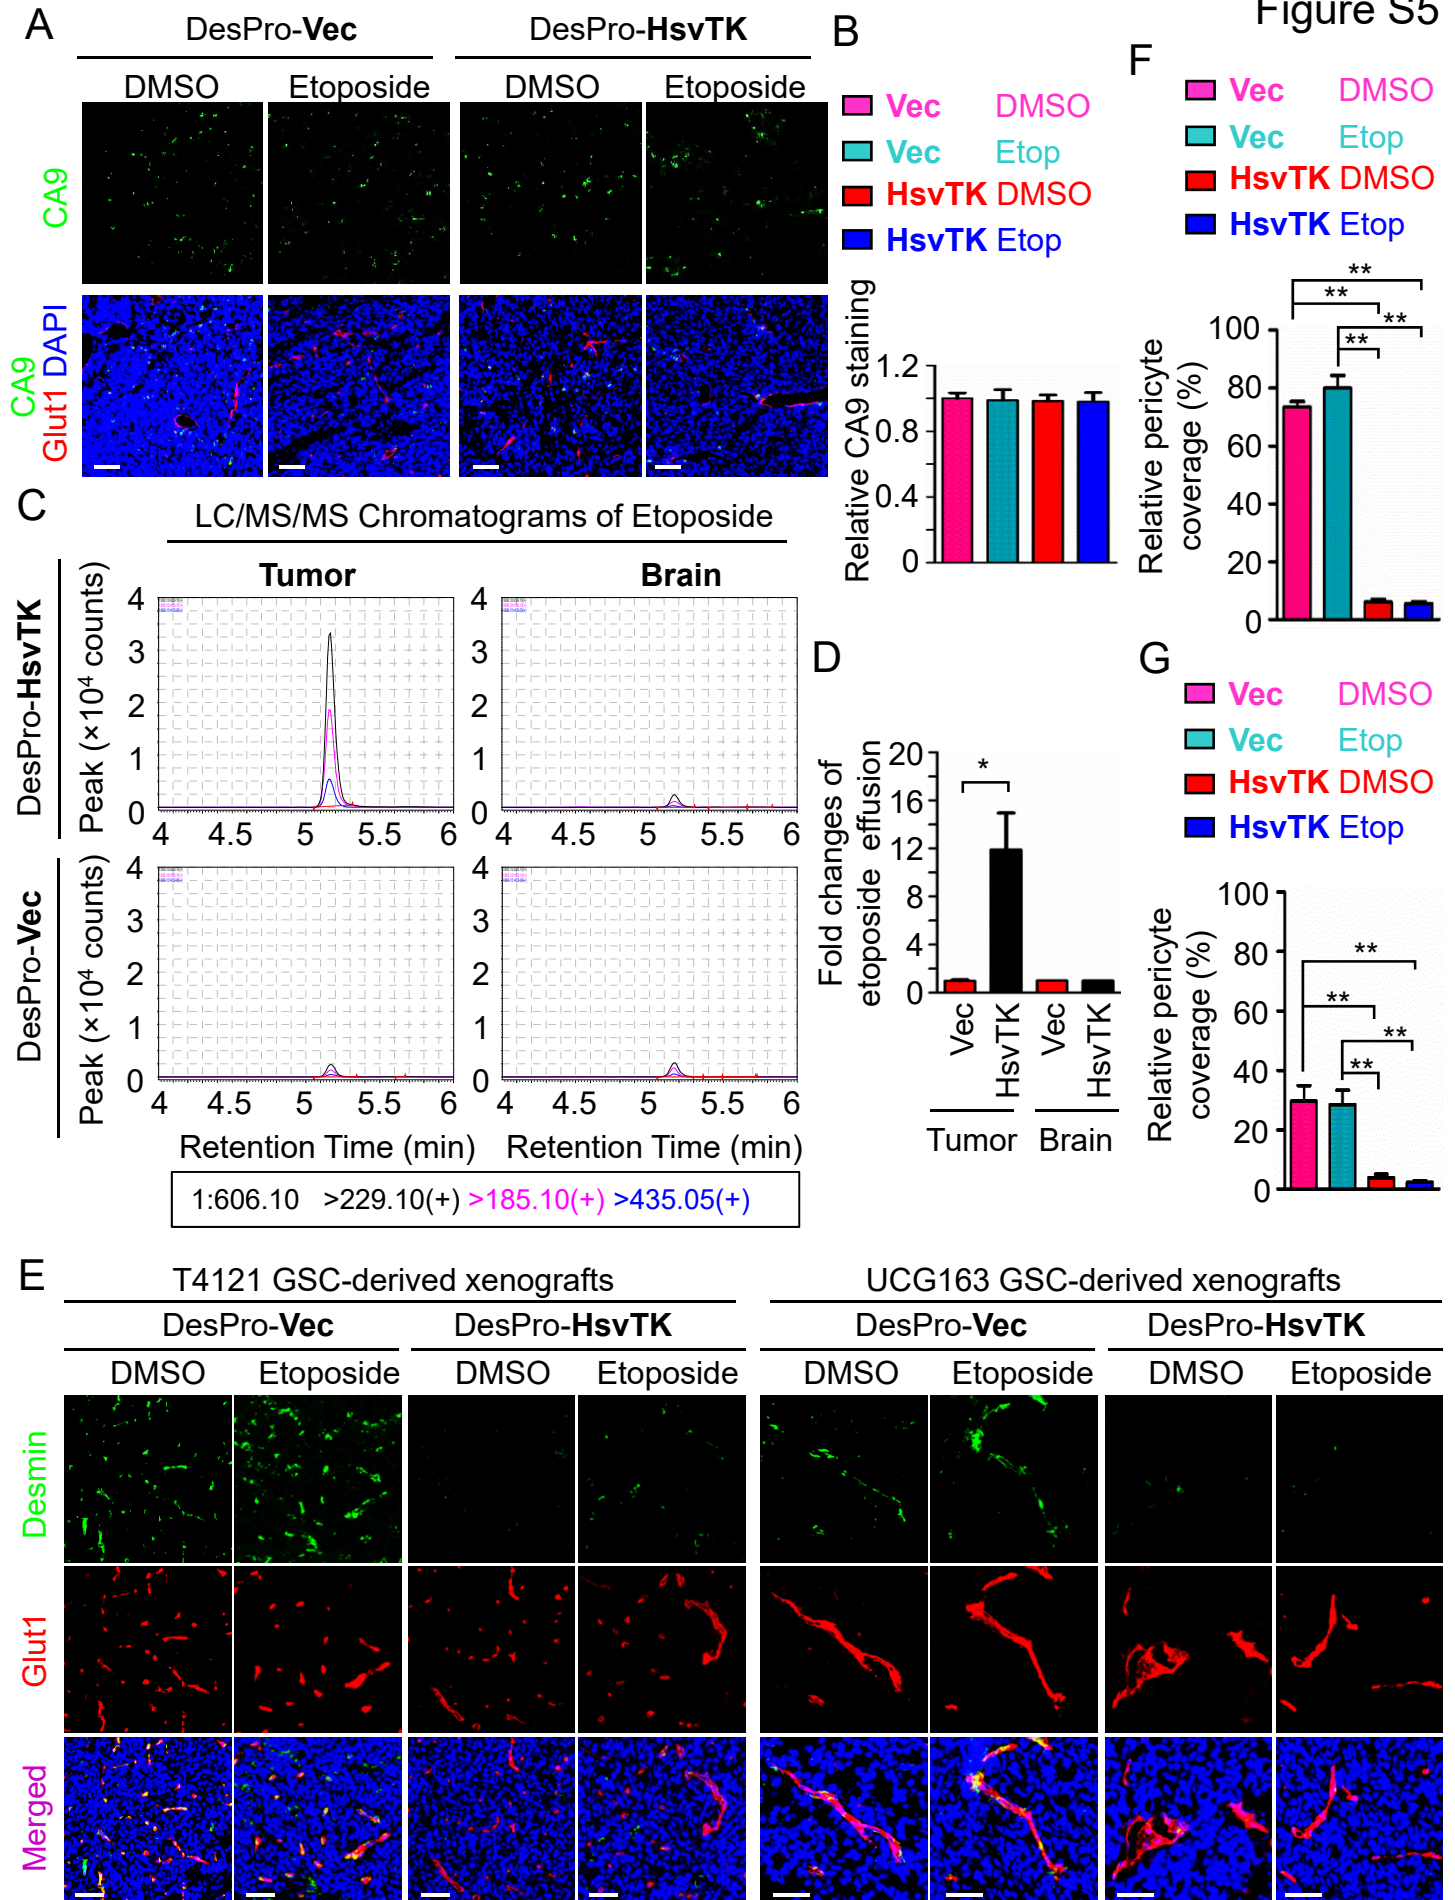

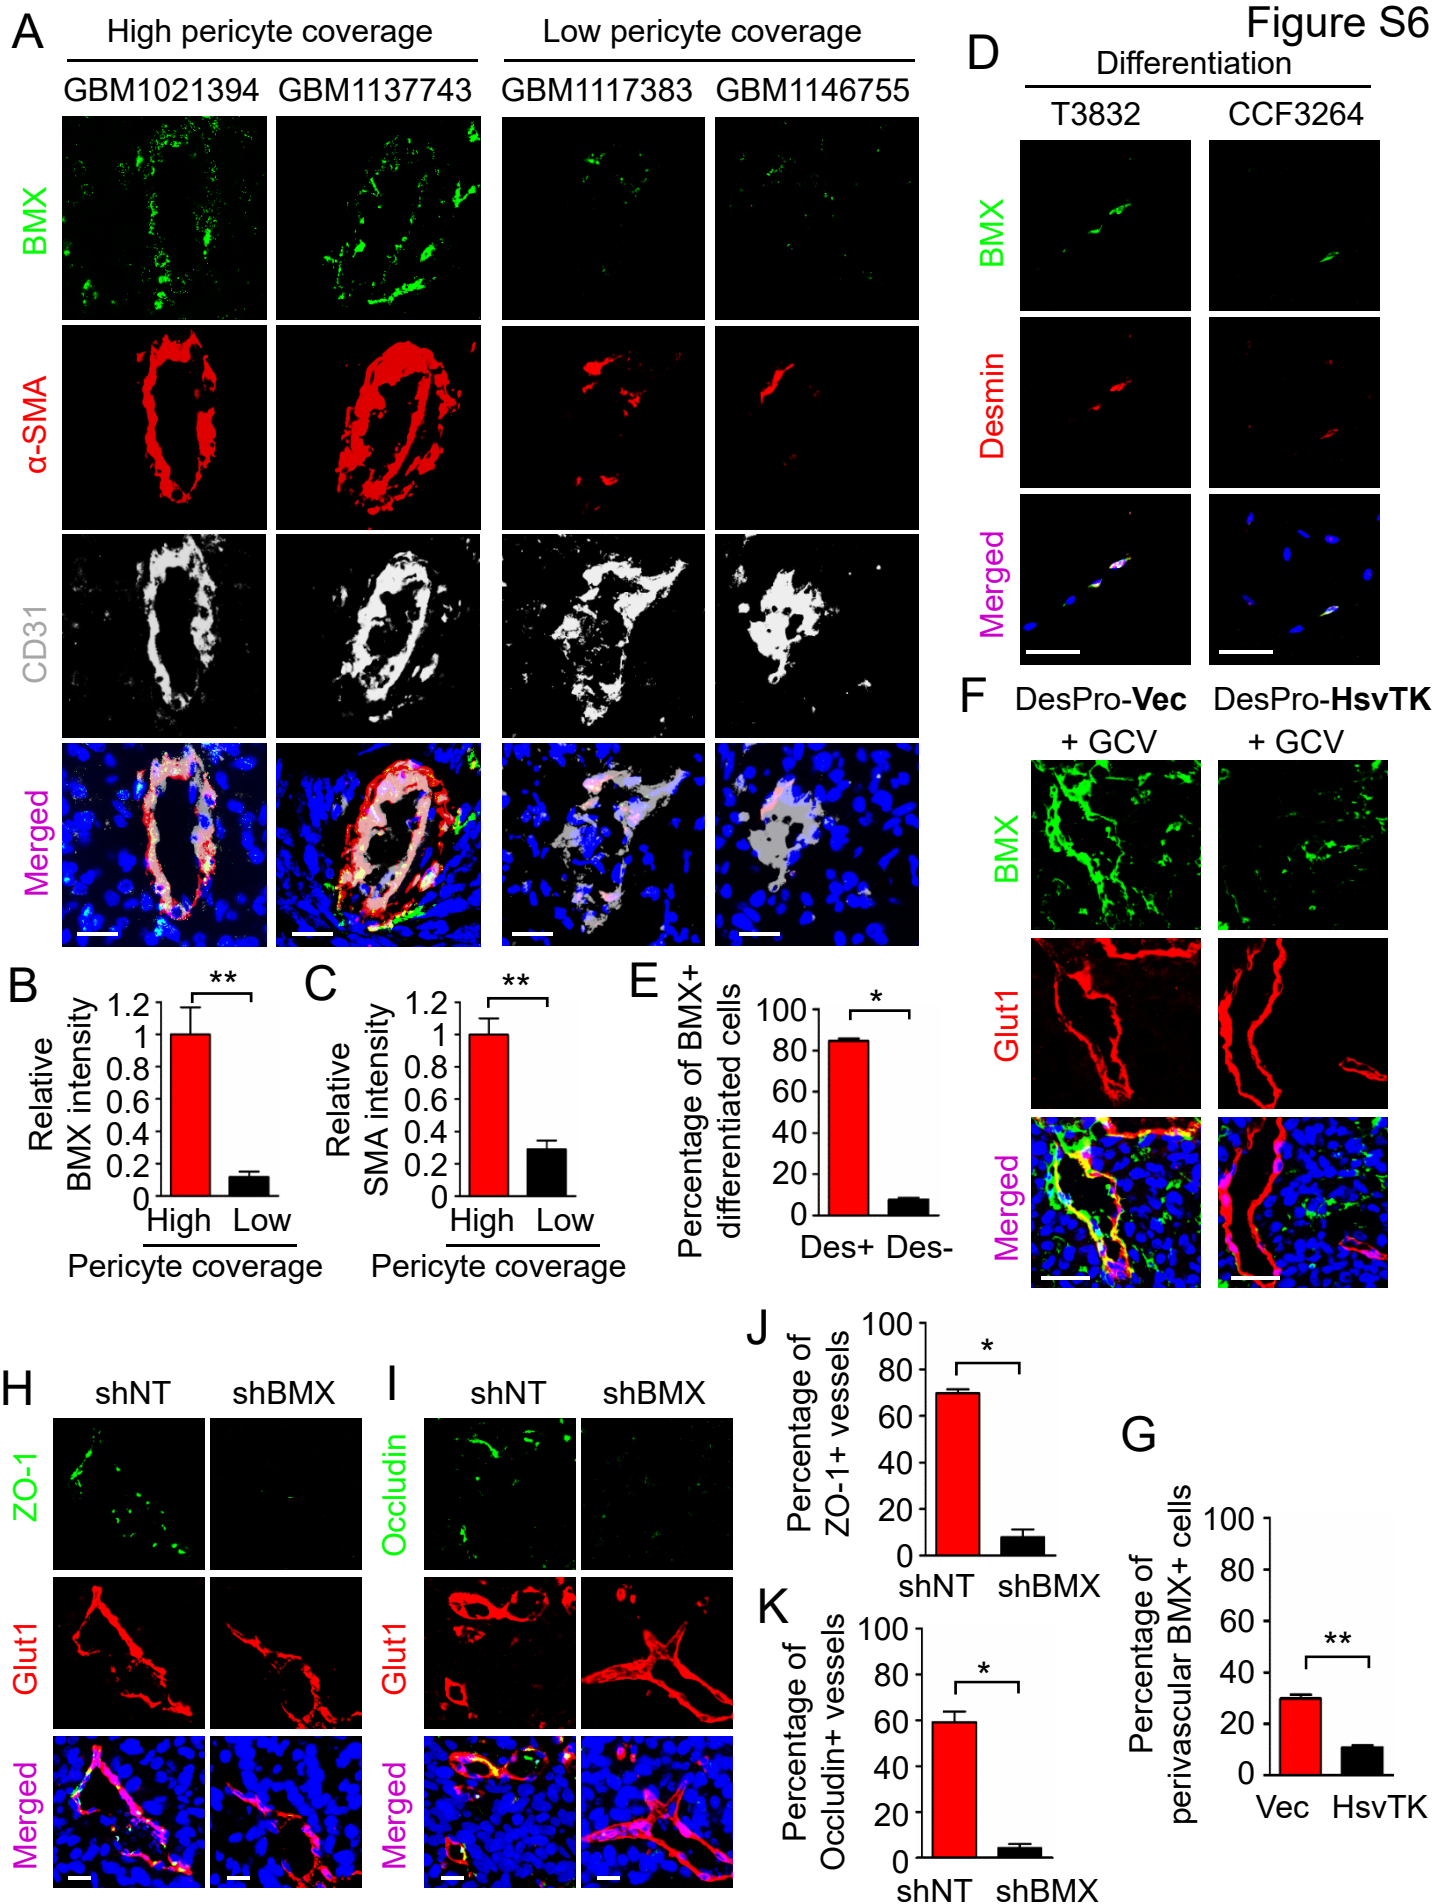

Figure S7

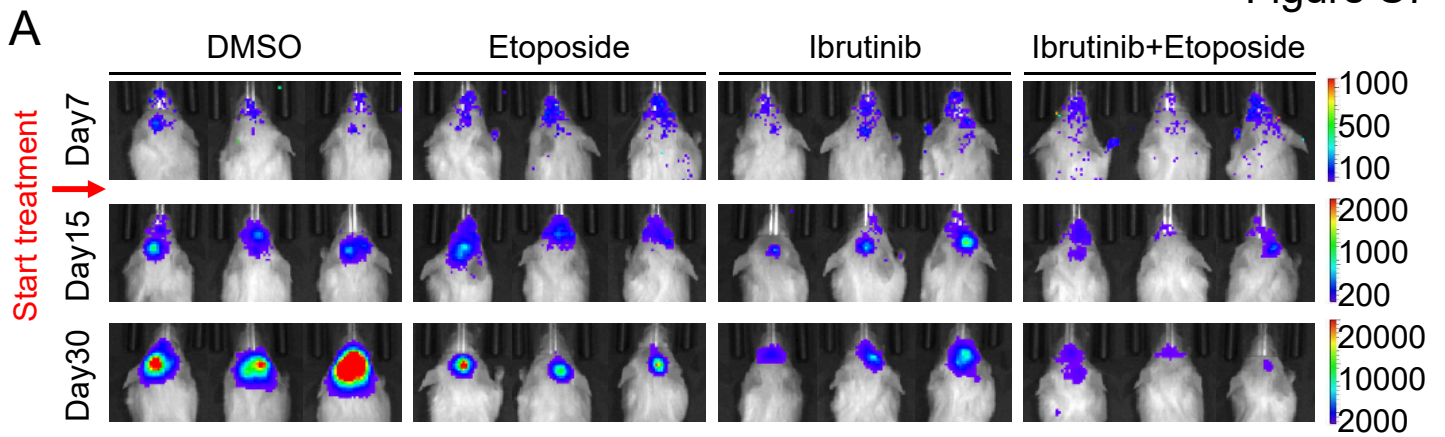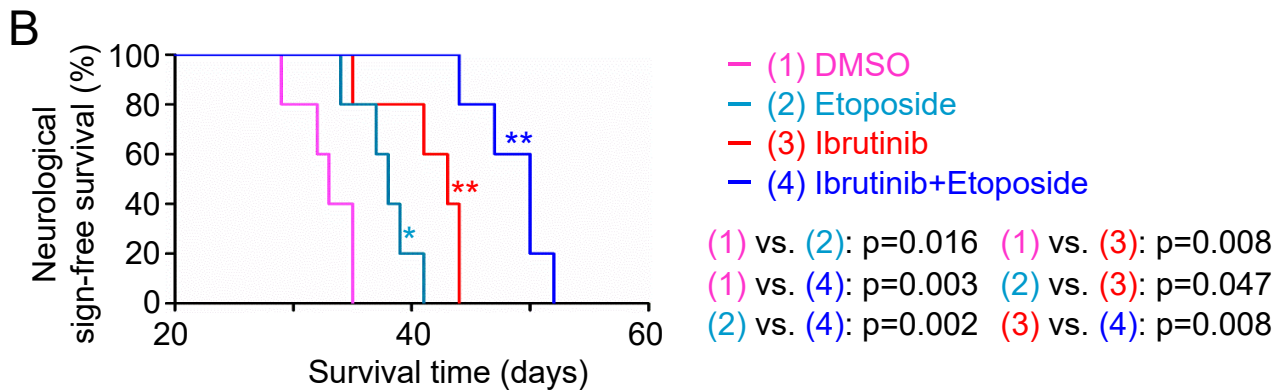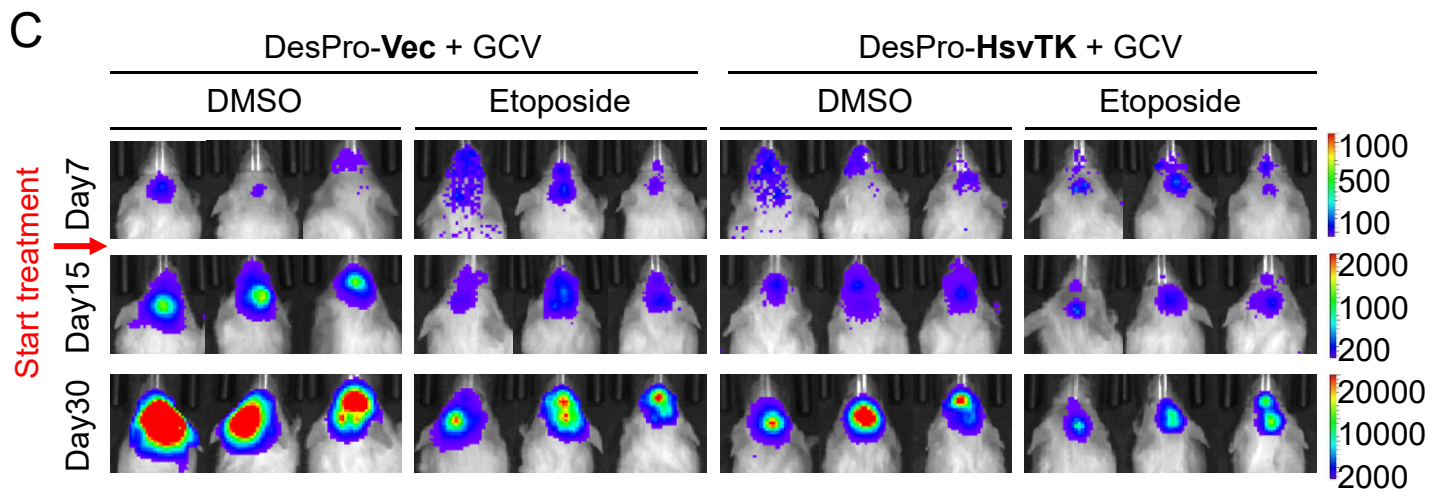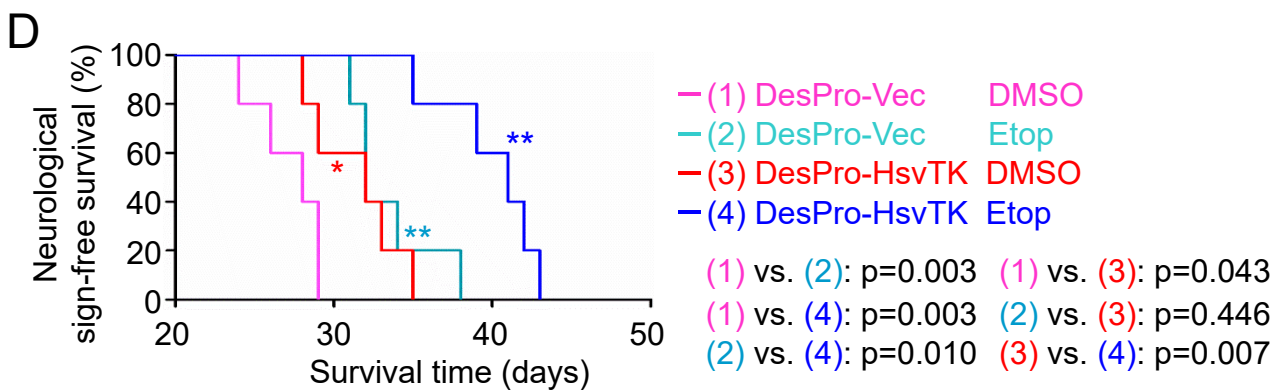

Table S1

**Table S1. Basic Information of GBM Patients in the Survival Study**

| Pathology ID | Gender | Age (years) | KPS | SMA/CD34 RATIO | Radio-therapy | Chemo-therapy | IDH1 mutation status | MGMT Status |
|--------------|--------|-------------|-----|----------------|---------------|---------------|----------------------|-------------|
| 201000727    | Female | 75          | 90  | 0.88           | Yes           | -             | MU                   | +           |
| 201003492    | Male   | 18          | 80  | 2.23           | No            | -             | WT                   | -           |
| 201004805    | Female | 50          | 70  | 1.00           | Yes           | TMZ           | WT                   | -           |
| 201009972    | Female | 26          | 40  | 0.47           | Yes           | ACNU          | WT                   | -           |
| 201017276    | Male   | 71          | 60  | 1.97           | No            | TMZ           | NOS                  | -           |
| 201020927    | Male   | 70          | 80  | 0.86           | No            | -             | WT                   | -           |
| 201021387    | Female | 28          | 40  | 0.01           | No            | TMZ           | MU                   | -           |
| 201021394    | Male   | 73          | 80  | 2.51           | Yes           | ACNU          | WT                   | -           |
| 201022270    | Male   | 45          | 80  | 0.41           | Yes           | ACNU          | MU                   | -           |
| 201023809    | Female | 69          | 80  | 0.19           | No            | -             | WT                   | +           |
| 201033554    | Male   | 48          | 90  | 3.78           | No            | TMZ           | WT                   | -           |
| 201037273    | Male   | 75          | 50  | 0.67           | No            | -             | WT                   | -           |
| 201037481    | Male   | 62          | 90  | 0.84           | No            | -             | MU                   | -           |
| 201037501    | Male   | 43          | 70  | 3.03           | No            | -             | WT                   | -           |
| 201039610    | Male   | 61          | 80  | 1.05           | No            | -             | MU                   | -           |
| 201041295    | Male   | 37          | 80  | 1.43           | Yes           | ACNU          | MU                   | -           |
| 201042448    | Male   | 42          | 70  | 0.78           | No            | -             | WT                   | +           |
| 201042794    | Female | 60          | 80  | 0.83           | No            | ACNU          | WT                   | -           |
| 201100535    | Female | 62          | 90  | 1.84           | No            | -             | NOS                  | -           |
| 201100912    | Male   | 44          | 80  | 1.80           | No            | ACNU          | WT                   | -           |
| 201104873    | Female | 55          | 90  | 0.87           | Yes           | ACNU          | WT                   | -           |
| 201109643    | Male   | 64          | 70  | 2.75           | Yes           | ACNU          | WT                   | -           |
| 201117383    | Male   | 13          | 80  | 0.37           | No            | -             | WT                   | -           |
| 201121887    | Male   | 50          | 40  | 1.30           | Yes           | TMZ           | WT                   | +           |
| 201124749    | Female | 67          | 70  | 0.57           | No            | -             | NOS                  | -           |
| 201128852    | Male   | 45          | 60  | 0.80           | Yes           | ACNU          | WT                   | -           |
| 201129272    | Male   | 62          | 80  | 1.86           | No            | -             | NOS                  | +           |
| 201129281    | Male   | 59          | 70  | 1.96           | No            | ACNU          | WT                   | +           |
| 201130514    | Female | 41          | 60  | 2.21           | No            | TMZ           | MU                   | +           |
| 201131949    | Male   | 54          | 90  | 0.80           | No            | -             | WT                   | -           |
| 201133838    | Male   | 54          | 90  | 0.26           | No            | ACNU          | WT                   | +           |
| 201136255    | Male   | 60          | 70  | 0.51           | Yes           | ACNU          | WT                   | +           |
| 201137743    | Male   | 39          | 90  | 2.44           | Yes           | -             | MU                   | -           |
| 201141427    | Male   | 49          | 90  | 1.09           | Yes           | ACNU          | WT                   | -           |
| 201142663    | Female | 72          | 80  | 1.64           | No            | ACNU          | WT                   | -           |
| 201143172    | Female | 60          | 60  | 0.55           | No            | ACNU          | NOS                  | +           |
| 201146755    | Female | 49          | 90  | 0.12           | No            | -             | WT                   | +           |
| 201149841    | Male   | 39          | 90  | 1.72           | Yes           | TMZ           | WT                   | +           |



|           |        |    |    |      |     |              |     |   |
|-----------|--------|----|----|------|-----|--------------|-----|---|
| 201202462 | Male   | 43 | 60 | 0.64 | No  | -            | WT  | + |
| 201202463 | Male   | 68 | 80 | 0.64 | No  | -            | MU  | + |
| 201203703 | Female | 72 | 70 | 0.44 | No  | ACNU         | WT  | + |
| 201209010 | Female | 41 | 90 | 0.68 | Yes | ACNU         | MU  | - |
| 201211305 | Female | 55 | 70 | 1.05 | No  | -            | WT  | - |
| 201211306 | Male   | 66 | 80 | 1.06 | No  | -            | WT  | - |
| 201212593 | Male   | 47 | 80 | 2.66 | Yes | ACNU         | WT  | - |
| 201216972 | Male   | 30 | 70 | 0.49 | Yes | ACNU         | MU  | - |
| 201218411 | Male   | 33 | 90 | 0.71 | Yes | ACNU<br>+TMZ | WT  | + |
| 201219358 | Female | 54 | 50 | 1.08 | Yes | TMZ          | NOS | - |
| 201231082 | Male   | 34 | 80 | 1.60 | No  | -            | WT  | - |
| 201238753 | Male   | 32 | 80 | 0.56 | Yes | TMZ          | MU  | - |
| 201241585 | Female | 45 | 70 | 0.87 | Yes | TMZ          | WT  | + |
| 201246830 | Male   | 53 | 80 | 1.16 | Yes | -            | WT  | - |
| 201306934 | Female | 21 | 90 | 0.28 | No  | -            | WT  | - |
| 201307204 | Male   | 32 | 90 | 1.98 | Yes | TMZ          | WT  | - |
| 201317259 | Male   | 55 | 90 | 0.37 | No  | -            | NOS | + |
| 201319360 | Female | 64 | 80 | 0.58 | Yes | TMZ          | WT  | - |
| 201327305 | Female | 56 | 80 | 0.33 | Yes | TMZ          | WT  | + |
| 201329927 | Female | 64 | 70 | 0.26 | Yes | TMZ          | MU  | + |
| 201330615 | Female | 23 | 70 | 0.09 | No  | TMZ          | MU  | + |
| 201333366 | Male   | 39 | 80 | 0.47 | Yes | TMZ          | WT  | + |
| 201336128 | Male   | 56 | 90 | 0.26 | No  | -            | WT  | - |
| 201400034 | Male   | 47 | 80 | 2.95 | No  | -            | MU  | + |
| 201401749 | Female | 44 | 90 | 0.63 | No  | TMZ          | MU  | + |
| 201403625 | Male   | 45 | 90 | 0.85 | Yes | TMZ          | NOS | + |
| 201405593 | Male   | 67 | 80 | 0.55 | Yes | TMZ          | MU  | + |
| 201423279 | Female | 64 | 90 | 0.50 | Yes | TMZ          | WT  | - |

KPS: Karnofsky Performance Scale Index indicates the functional impairment of the patients. The lower score stands for the worse status of the patient.

TMZ: Temozolomide

ACNU: Nimustine

IDH1 status: WT, wild type; MU, mutant type; NOS, not otherwise specified.

The table contains basic information of the GBM patients in the survival study, including the pathology ID, gender, age, KPS index, pericyte coverage (the ratio of SMA/CD34 density in each GBM), radiotherapy situation (yes or no), drugs used for chemotherapy, IDH1 mutation status and the MGMT status.

## SUPPLEMENTARY FIGURE LEGENDS

### **Figure S1. Human GBM Tumors Display Varied Pericyte Coverage on Vessels, [Related to Figure 1.](#)**

(A) Immunofluorescent analyses of the tumor pericyte marker  $\alpha$ -SMA (in green) and the endothelial marker CD31 (in red) showing the varied pericyte coverage in different human primary GBMs. Frozen sections of GBM specimens were immunostained for  $\alpha$ -SMA and CD31 and then counterstained with DAPI (in blue). Representative images were shown for the high pericyte coverage (left panel) and the low pericyte coverage (right panel) in two typical cases of GBM surgical specimens. Scale bar represents 80 $\mu$ m.

(B) Immunofluorescent staining of the endothelial cell markers CD31 (in red) and CD34 (in green) to mark tumor vessels on frozen sections of a human primary GBM. Both CD31 and CD34 marked the same vessels in the GBM tumor. Scale bar represents 80 $\mu$ m.

(C) Immunohistochemical staining of the endothelial cell marker CD31 (left panel) or CD34 (right panel) to label tumor vessels on consecutive FFPE sections in a human primary GBM. Sequential FFPE sections of a human GBM were immunostained with anti-CD31 or anti-CD34 antibody. The anti-CD34 antibody showed stronger staining than the anti-CD31 antibody in the paraffin sections. Scale bar represents 20 $\mu$ m.

(D) Dot plots of pericyte coverage in GBM tumors with high or low pericyte coverage from different patients. Pericyte coverage was defined as the ratio of  $\alpha$ -SMA intensity (pericyte density) to the CD34 intensity (endothelial density) detected in immunohistochemical staining. The average pericyte coverage of all GBMs was used as the cut-off to divide GBM patients into high and low pericyte coverage groups. These two groups showed a significant difference in their

pericyte coverage. \*\*\*,  $p < 0.001$  ( $n = 45$  for low pericyte coverage,  $n = 21$  for high pericyte coverage,  $p < 0.001$ , mean  $\pm$  s.d.; Mann Whitney test).

**Figure S2. Disruption of GSC-derived Pericytes Increased Vascular Permeability in GBM Xenografts, Related to Figure 2.**

(A) Immunofluorescent analyses of the pericyte marker Desmin (in green) and the endothelial marker Glut1 (in red) in GBM xenografts derived from T4121 or CCF2045 GSCs transduced with DesPro-HsvTK or DesPro-Vec after GCV treatment for 4 days. Frozen sections of the xenografts were immunostained with specific antibodies against Desmin and Glut1 and counterstained with DAPI (in blue) ( $n = 5$  tumors for each group). GCV treatment for a short time (4 days) resulted in a reduction of pericytes in the tumors derived from DesPro-HsvTK-transduced GSCs relative to control tumors derived from DesPro-Vec-transduced GSCs, but the overall vessel density was not affected by the short-term disruption of pericytes. Scale bar represents  $80\mu\text{m}$ .

(B) Statistical analysis of pericyte coverage in xenografts derived from the GSCs transduced with DesPro-Vec or DesPro-HsvTK after GCV treatment described in (A). Pericyte coverage was significantly reduced in xenografts derived from the GSCs transduced with DesPro-HsvTK relative to xenografts derived from the GSCs transduced with DesPro-Vec after GCV treatment for 4 days. ( $n = 5$  tumors for each group, \*\*,  $p < 0.01$ , mean  $\pm$  s.e.m.; Mann Whitney test).

(C) Statistical quantification of vessel density in xenografts derived from GSCs transduced with DesPro-Vec or DesPro-HsvTK after GCV treatment described in (A). No significant difference in vessel density was observed between tumors derived from GSCs transduced with DesPro-Vec or DesPro-HsvTK after GCV treatment for 4 days. Vessel density was analyzed with Image J. ( $n$

= 5 tumors for each group; mean  $\pm$  s.e.m.; ns,  $p > 0.01$ ; Mann Whitney test).

(D) Fluorescent analysis of small molecule effusion using the autonomous fluorescent tracer cadaverine (in green, 1kDa) and immunofluorescent staining of the endothelial marker CD31 (in red) in GBM xenografts derived from the GSCs (CCF2045) transduced with DesPro-HsvTK or DesPro-Vec after GCV treatment. Substantial cadaverine effusion into tumor tissues was detected in xenografts derived from the GSCs transduced with DesPro-HsvTK after GCV treatment for 4 days to disrupt the GSC-derived pericytes. However, negligible cadaverine signal was detected in the control xenografts derived from the GSCs transduced with DesPro-Vec after the GCV treatment. This indicates that disruption of GSC-derived pericytes increased vascular permeability in the tumor. Scale bar represents 80 $\mu$ m.

(E) Statistical quantification of cadaverine effusion into xenografts derived from the GSCs transduced with DesPro-HsvTK or DesPro-Vec control after GCV treatment as described in (D). Cadaverine effusion into tumors was determined by cadaverine positive areas normalized to vessel density. A significant increase of cadaverine effusion was detected in xenografts derived from the DesPro-HsvTK-transduced GSCs relative to xenografts derived from the DesPro-Vec-transduced GSCs after GCV treatment. (n = 5 tumors for each group; \*\*,  $p < 0.01$ ; mean  $\pm$  s.e.m.; Mann Whitney test).

(F) Fluorescent analysis of the effusion of medium-sized molecules with the autonomous fluorescent tracer Alexa Fluor 488 dextran-3kDa (in green) and immunofluorescent staining of the endothelial marker CD31 (in red) in xenografts derived from the GSCs (CCF2045) transduced with DesPro-HsvTK or DesPro-Vec control after GCV treatment. An increase of the dextran signal was detected in xenografts derived from the DesPro-HsvTK-transduced GSCs relative to the DesPro-Vec-transduced GSCs after GCV treatment. Scale bar represents 80 $\mu$ m.

(G) Statistical quantification of the effusion of medium-sized molecules (Alexa Fluor 488 dextran-3kDa) into xenografts derived from the GSCs transduced with DesPro-HsvTK or DesPro-Vec control after GCV treatment described in (F). Dextran effusion was determined by dextran positive areas normalized to vessel density. The effusion of the 3kDa dextran was increased in xenografts derived from the DesPro-HsvTK-transduced GSCs relative to xenografts derived from the DesPro-Vec-transduced GSCs after GCV treatment. (n = 5 tumors for each group; \*\*,  $p < 0.01$ ; mean  $\pm$  s.e.m.; Mann Whitney test).

(H) Fluorescent analysis of the effusion of large molecules with the autonomous fluorescent tracer Alexa Fluor 488 dextran-40kDa (in green) and immunofluorescent staining of the endothelial marker CD31 (in red) in xenografts derived from the GSCs (CCF2045) transduced with DesPro-HsvTK or DesPro-Vec control after GCV treatment. Negligible dextran signal was detected in both xenografts derived from the GSCs transduced with DesPro-HsvTK or DesPro-Vec after GCV treatment, indicating that disruption of GSC-derived pericytes did not increase effusion of large molecules into GBM tumors. Scale bar represents 80 $\mu$ m.

(I) Statistical quantification of the effusion of large molecules (dextran-40kDa) into xenografts derived from the GSCs transduced with DesPro-HsvTK or DesPro-Vec control after GCV treatment described in (H). Dextran effusion was determined by dextran positive areas normalized to vessel density. No difference in dextran effusion was detected in xenografts derived from the DesPro-HsvTK-transduced GSCs relative to xenografts derived from the DesPro-Vec-transduced GSCs after the GCV treatment, indicating that disruption of GSC-derived pericytes could not increase effusion of large molecule into tumor tissues (n = 5 tumors for each group; ns,  $p > 0.05$ ; mean  $\pm$  s.e.m.; Mann Whitney test).

**Figure S3. Elimination of GSC-derived Pericytes Disrupted the BTB Tight Junctions but Not Other BTB Components, Related to Figure 3.**

(A and B) Immunofluorescent analyses of the tight junction markers ZO-1 (A) and Occludin (B) (in green) and the vessel marker CD31 (in red) in xenografts derived from the GSCs (CCF2045) transduced with DesPro-Vec or DesPro-HsvTK after GCV treatment. ZO-1 or Occludin signal on tumor vessels was reduced in xenografts derived from the DesPro-HsvTK-transduced GSCs relative to the control xenografts derived from the DesPro-Vec-transduced GSCs. Scale bar represents 80 $\mu$ m.

(C and D) Statistical quantification of (A) and (B) to determine ZO-1 (C) and Occludin (D) staining signals on vessels in xenografts derived from the GSCs transduced with DesPro-HsvTK or DesPro-Vec after GCV treatment. The percentage of ZO-1-positive or Occludin-positive vessels was determined by the numbers of ZO-1-positive or Occludin-positive cells normalized to the numbers of CD31-positive cells (n = 5 tumors for each group; \*\*,  $p < 0.01$ ; mean  $\pm$  s.e.m.; Mann Whitney test).

(E) Immunofluorescent staining of the vascular basement membrane marker Laminin (in green) and the endothelial marker CD31 (in red) in xenografts derived from the GSCs (CCF2045) transduced with DesPro-Vec or DesPro-HsvTK after GCV treatment. Vessels in both groups of xenografts were covered with basement membrane, indicating that disruption of GSC-derived pericytes did not impact integrity of vascular basement membrane. Scale bar represents 40 $\mu$ m.

(F) Statistical quantification of the vessel basement membrane in (E). Vascular basement membrane was quantified according to the percentage of CD31-positive vessels covered by Laminin-positive basement membrane. Vascular basement membrane coverage had no difference between xenografts derived from the DesPro-HsvTK-transduced GSCs and those derived from

DesPro-Vec-transduced GSCs. (n = 5 tumor for each group; ns,  $p > 0.05$ ; mean  $\pm$  s.e.m.; Mann Whitney test).

(G) Immunofluorescent analysis of the transcytosis marker Plvap (in green) and the endothelial marker Glut1 (in red) in xenografts derived from the GSCs (CCF2045) transduced with DesPro-Vec or DesPro-HsvTK. Substantial Plvap expression was detected in endothelial cells in both groups of the xenografts, indicating an intact transcytosis across endothelial cells on vessels with or without pericyte disruption. Scale bar represents 40 $\mu$ m.

(H) Statistical quantification of Plvap levels in endothelial cells in (G). Percentage of endothelial cells (Glut1+) positive for Plvap was quantified. No difference of Plvap intensity was found between xenografts derived from the GSCs transduced with DesPro-Vec and DesPro-HsvTK after GCV treatment, indicating that disruption of GSC-derived pericytes did not impact transcytosis in endothelial cells. (n = 5 tumors for each group; ns,  $p > 0.05$ ; mean  $\pm$  s.e.m.; Mann Whitney test).

**Figure S4. Disruption of GSC-derived Pericytes Did Not Impact Other BTB Components except for Tight Junctions, [Related to Figure 3](#).**

(A) Immunofluorescent analysis of the vascular basement membrane marker Laminin (in green) and the endothelial marker CD31 (in red) in xenografts derived from the GSCs (T4121) transduced with DesPro-Vec or DesPro-HsvTK after GCV treatment. Vessels in both groups of xenografts were covered with similar basement membrane, indicating that disruption of GSC-derived pericytes did not impact integrity of vascular basement membrane. Scale bar represents 40 $\mu$ m.

(B) Statistical quantification of the vessel basement membrane in (A). Vascular basement

membrane was quantified according to the percentage of CD31-positive vessels covered by Laminin-positive basement membrane. Vascular basement membrane coverage had no difference between xenografts derived from the DesPro-HsvTK-transduced GSCs and the DesPro-Vec-transduced GSCs. (n = 5 tumors for each group; ns,  $p > 0.05$ ; mean  $\pm$  s.e.m.; Mann Whitney test).

(C) Immunofluorescent staining of the transcytosis marker Plvap (in green) and the endothelial marker Glut1 (in red) in xenografts derived from the GSCs (T4121) transduced with DesPro-Vec or DesPro-HsvTK after GCV treatment. Substantial Plvap expression was detected in endothelial cells in both groups of the xenografts, indicating intact transcytosis across endothelial cells with or without disruption of pericytes. Scale bar represents 40 $\mu$ m.

(D) Statistical quantification of Plvap signals in endothelial cells in (C). Percentage of endothelial cells (Glut1+) positive for Plvap was quantified. No difference of Plvap intensity was found between xenografts derived from the GSCs transduced with DesPro-Vec and DesPro-HsvTK, indicating that disruption of GSC-derived pericytes did not impact transcytosis in endothelial cells. (n = 5 tumors for each group; ns,  $p > 0.05$ ; mean  $\pm$  s.e.m.; Mann Whitney test).

(E) Immunofluorescent analysis of the transcytosis marker Plvap (in green) and the endothelial marker Glut1 (in red) in xenografts derived from the GSCs (T4121) transduced with DesPro-Vec or DesPro-HsvTK and in the matched normal brain tissues after GCV treatment. Substantial Plvap expression was detected in endothelial cells in tumor tissues but not in normal brain tissues. Scale bar represents 40 $\mu$ m.

(F) Statistical quantification of Plvap signals in endothelial cells. Percentage of endothelial cells (Glut1+) positive for Plvap was quantified. Plvap intensity was significantly increased in tumors than in matched normal brain tissues. (n = 5 tumors for each group; \*\*,  $p < 0.01$ ; mean  $\pm$  s.e.m.; Mann Whitney test).



(G and H) Statistical quantification to show the fold change of the endothelial vesicle number in endothelial cells on tumor vessels (G) and brain vessels (H) after disruption of tumor neoplastic pericytes. T4121 GSCs transduced with DesPro-Vec or DesPro-HsvTK were injected into mouse brains. Twenty days after GSC implantation, mice bearing tumors were treated with GCV for 5 days. Vascular ultrastructure of tumor tissue and the corresponding normal brain tissue were analyzed by transmission electron microscopy. For quantification of endothelial vesicles, the small vesicles (20 to 100 nm in diameter) inside vascular endothelial cells, which appeared as circular organelles having lighter electron density within, were counted and quantified. No significant change in the numbers of transcytotic vesicles was observed in tumor or brain vascular endothelial cells after disruption of tumor neoplastic pericytes. (n = 12 vessels for each group; ns,  $p > 0.05$ ; mean  $\pm$  s.e.m.; Mann Whitney test).

(I) Immunofluorescent analysis of the astrocyte marker GFAP (in green) and the endothelial marker Glut1 (in red) in xenografts derived from the GSCs (T4121) transduced with DesPro-Vec or DesPro-HsvTK after GCV treatment. Blood vessels in both groups of xenografts showed little contact with astrocytes. Scale bar represents 20 $\mu$ m.

(J) Statistical quantification of the vessels covered by astrocyte end-feet in (I). Astrocyte end-feet coverage on vessels was determined by the percentage of endothelial cells (Glut1+) in contact with astrocyte (GFAP+) end-feet. Little astrocyte end-feet coverage was detected in either groups of the xenografts. No difference of the astrocyte end-feet was detected between xenografts derived from the DesPro-HsvTK-transduced GSCs and the DesPro-Vec-transduced GSCs after GCV treatment (n = 5 tumors for each group; ns,  $p > 0.05$ ; mean  $\pm$  s.e.m.; Mann Whitney test).

**Figure S5. Pulse Disruption of Neoplastic Pericytes Maintained Vascular Perfusion but**

#### **Increased Etoposide Effusion into Tumor Tissues, [Related to Figure 4.](#)**

(A) Immunofluorescent analysis of the hypoxia marker CA9 (in green) to detect changes in vascular perfusion and analysis of the endothelial cell marker Glut1 (in red) to label vessels in xenografts derived from T4121 GSCs transduced with DesPro-Vec or DesPro-HsvTK after GCV in combination with etoposide treatment. 5 days after GSC implantation, mice bearing the tumors were treated with pulse administration of GCV (1mg/20g) for two consecutive days with a two-day interval. Etoposide (60 $\mu$ g/20g) was administered daily. 25 days post-transplantation, xenografts in mouse brains were harvested for the analysis. Scattered CA9 signals at the similar intensity were detected in tumors from all groups, indicating that pulse disruption of GSC-derived pericytes by such GCV treatment did not affect vascular perfusion. Scale bar represents 80 $\mu$ m.

(B) Statistical quantification of (A) shows the relative CA9 intensity in tumors from all four treatment groups. No significant change of CA9 intensity was detected in tumors with or without the pulse disruption of GSC-derived pericytes, suggesting that the vascular perfusion was maintained after the pulse disruption of the neoplastic pericytes. (n = 5 tumors for each group; mean  $\pm$  s.e.m.; Mann Whitney test).

(C) Representative LS/MS/MS chromatograms of etoposide concentrations in tumor tissues and the matched normal brain tissues in mice bearing GBM xenografts derived from T4121 GSCs transduced with DesPro-HsvTK or DesPro-Vec control after GCV treatment. 20 days after transplantation of GSCs, mice were treated with GCV for 4 days followed by intraperitoneal injection of etoposide (60 $\mu$ g/20g). 2 hours after etoposide injection, mice were anaesthetized, perfused with PBS, and sacrificed. Tumors and the corresponding normal brain tissues were collected, homogenized in PBS, and subjected to LS/MS/MS chromatography. An obvious

increase of etoposide drug signal was detected in tumor tissues relative to the matched normal brain tissues after disruption of GSC-derived neoplastic pericytes (upper panel). Similar etoposide signals were detected in tumor tissues and matched normal brain tissues without disruption of the neoplastic pericytes (lower panel).

(D) Statistical analysis of the LS/MS/MS chromatography to show the relative fold changes of etoposide effusion into tumor tissues and the matched brain tissues in mice bearing GBMs derived from T4121 GSCs transduced with DesPro-Vec or DesPro-HsvTK after GCV treatment. Selective disruption of GSC-derived neoplastic pericytes significantly increased etoposide effusion into tumor tissues but not into the matched normal brain tissues. (n = 5 mice for each group; \*,  $p < 0.05$ ; mean  $\pm$  s.e.m.; Mann Whitney test).

(E) Immunofluorescent analysis of the pericyte marker Desmin (in green) and the endothelial marker Glut1 (in red) in xenografts derived from GSCs (T4121 and UCG163) transduced with DesPro-HsvTK or DesPro-Vec control after treatment with GCV in combination with etoposide or DMSO. Mice bearing the GSC-derived xenografts were treated with pulsed-dose GCV plus etoposide or DMSO. Pericyte coverage was relatively high in the T4121 GSC-derived xenografts and relatively low in the UCG163 GSC-derived xenografts. However, in both tumors, GCV treatment disrupted vascular pericytes in xenografts derived from the DesPro-HsvTK-transduced GSCs but not in the xenografts derived from the DesPro-Vec-transduced GSCs, confirming selective targeting of GSC-derived pericytes expressing HsvTK by GCV treatment. Scale bar represents 80 $\mu$ m.

(F and G) Statistical quantification of pericyte coverage in xenografts derived from the T4121 GSCs (F) or CCF2045 GSCs (G) transduced with DesPro-Vec or DesPro-HsvTK after pulsed-dose GCV plus etoposide or DMSO treatment described in (E). Pericyte coverage was

significantly reduced in xenografts derived from GSCs transduced with DesPro-HsvTK relative to xenografts derived from the GSCs transduced with DesPro-Vec control after GCV treatment. (n = 5 tumors for each group; \*\*,  $p < 0.01$ , mean  $\pm$  s.e.m.; Mann Whitney test).

**Figure S6. BMX Is Highly Expressed in GSC-derived Pericytes and Targeting BMX Disrupted the BTB Tight Junctions in GBM Tumors, [Related to Figures 5 and 6.](#)**

(A) Immunofluorescent analysis of BMX (in green), the tumor pericyte marker  $\alpha$ -SMA (in red), and the endothelial cell marker CD31 (in gray) in human primary GBM tumors with high and low pericyte coverage. BMX staining was detected in the vascular pericytes ( $\alpha$ -SMA+) on tumor vessels in GBMs. Relatively high BMX expression was detected in GBM specimens with high pericyte coverage relative to the tumor specimens with low pericyte coverage. Scale bar represents 40 $\mu$ m.

(B and C) Statistical quantification of (A) shows the relative intensity of BMX (B) and  $\alpha$ -SMA (C) signals in GBMs with high or low pericyte coverage. A significantly higher expression of BMX and  $\alpha$ -SMA was detected in GBM specimens with high pericyte coverage relative to the GBMs with low pericyte coverage. (n = 5 specimens for each group; \*\*,  $p < 0.01$ ; mean  $\pm$  s.e.m.; Mann Whitney test).

(D) Immunofluorescent staining of BMX (in green) and the pericyte marker Desmin (in red) in the differentiated cells derived from T3832 and CCF3264 GSCs. GSCs were cultured in DMEM supplemented with 10% FBS for 5 days to achieve differentiation. BMX signals were detected in pericyte-like cells (Desmin+) in vitro. Scale bar represents 40 $\mu$ m.

(E) Statistical quantification of (D) shows the percentage of BMX positive staining in Desmin+ pericyte-like cells in vitro in differentiated glioma cells. More than 80% of the Desmin+

pericyte-like cells also showed BMX expression (n = 100 cells for each group; three independent replicates; \*,  $p < 0.05$ ; mean  $\pm$  s.e.m.; Mann Whitney test).

(F) Immunofluorescent analysis of BMX (in green) and the endothelial marker Glut1 (in red) in xenografts derived from GSCs transduced with DesPro-HsvTK or DesPro-Vec control after GCV treatment. GCV treatment reduced BMX signals surrounding the vessels in xenografts derived from the DesPro-HsvTK-transduced GSCs relative to xenografts derived from the DesPro-Vec-transduced GSCs. As GCV treatment selectively targets GSC-derived pericytes expressing HsvTK, the loss of BMX signal surrounding the vessels confirmed that GSC-derived neoplastic pericytes express BMX. However, in the non-vessel areas, the BMX<sup>+</sup> population (GSCs) was not affected by the disruption of GSC-derived pericytes. Scale bar represents 40 $\mu$ m.

(G) Statistical quantification of the percentage of BMX<sup>+</sup> cells in vascular and perivascular regions in xenografts derived from the GSCs transduced with DesPro-Vec or DesPro-HsvTK after GCV treatment. BMX<sup>+</sup> cells in the vascular and perivascular areas (in the proximity of vessels within 100 $\mu$ m) were analyzed. Percentage of BMX<sup>+</sup> cells was significantly reduced in xenografts derived from GSCs transduced with DesPro-HsvTK relative to xenografts derived from the GSCs transduced with DesPro-Vec control after GCV treatment (n = 5 tumors for each group; \*\*,  $p < 0.01$ , mean  $\pm$  s.e.m.; Mann Whitney test).

(H and I) Immunofluorescent staining of the tight junction markers ZO-1 (H) and Occludin (I) (in green) and the endothelial marker Glut1 (in red) in orthotopic xenografts derived from GSCs (T4121) expressing shNT or shBMX. A reduced ZO-1 and Occludin expression on vessels was detected in xenografts derived from shBMX-expressing GSCs relative to xenografts derived from shNT-expressing GSCs, which was reminiscent of the loss of tight junctions in xenografts with pericyte disruption. Scale bar represents 80 $\mu$ m.

(J and K) Statistical quantification of (H and I) to determine the ZO-1 (J) and Occludin (K) signals on vessels in xenografts derived from GSC expressing shNT or shBMX. Percentage of ZO-1- and Occludin-positive vessels was determined by the numbers of ZO-1- and Occludin-positive cells normalized to the numbers of Glut1-positive cells (n = 5 tumors for each group; \*,  $p < 0.05$ ; mean  $\pm$  s.e.m.; Mann Whitney test).

**Figure S7. Targeting GSC-derived Pericytes Improved Chemotherapy Efficacy in GBMs with Low Pericyte Coverage, [Related to Figure 7](#).**

(A) *In vivo* bioluminescent imaging of intracranial tumor growth in mice bearing GBMs derived from UCG163 GSCs after treatment with etoposide, ibrutinib, etoposide plus ibrutinib, or DMSO control. Orthotopic GBM xenografts derived from UCG163 GSCs have relatively low pericyte coverage (Fig. S6C). Mice bearing the tumors were treated with DMSO control, etoposide, ibrutinib, or etoposide plus ibrutinib. The treatments started on day 7 after post-transplantation. Representative images on day 7, day 15 and day 30 post-transplantation of GSCs were shown. Etoposide or ibrutinib treatment alone showed some modest inhibition of tumor growth, but the etoposide plus ibrutinib treatment achieved maximal inhibition of tumor growth.

(B) Kaplan-Meier survival curves of mice bearing GBMs derived from UCG163 GSCs after treatment with etoposide, ibrutinib, etoposide plus ibrutinib, or DMSO control. Etoposide or ibrutinib treatment alone significantly extended animal survival. However, etoposide plus ibrutinib treatment achieved the longest survival of animals among the four groups (n = 5 mice for each group; \*,  $p < 0.05$ ; \*\*,  $p < 0.01$ ; two-tailed log-rank test).

(C) *In vivo* bioluminescent imaging of intracranial tumor growth in mice bearing the orthotopic xenografts derived from UCG163 GSCs transduced with DesPro-Vec or DesPro-HsvTK after

treatment with GCV in combination with etoposide or DMSO. Mice bearing the tumors were treated with etoposide or DMSO control along with pulse GCV treatment. The treatments started on day 7 after transplantation. Representative images on day 7, day 15 and day 30 post-transplantation of GSCs were shown. Etoposide treatment or disrupting GSC-derived pericytes by GCV showed some inhibition of tumor growth, but etoposide treatment plus disruption of GSC-derived pericytes by GCV achieved the maximal inhibition of tumor growth in xenografts derived from the DesPro-HsvTK-transduced GSCs.

(D) Kaplan-Meier survival curves of mice bearing GBMs derived from UCG163 GSCs transduced with DesPro-Vec or DesPro-HsvTK after treatment described in (C). Etoposide treatment or disrupting GSC-derived pericytes by GCV significantly extended animal survival. However, etoposide plus disruption of GSC-derived pericytes by GCV achieved the longest survival of mice bearing the xenografts derived from the DesPro-HsvTK-transduced GSCs (n = 5 mice for each group; \*,  $p < 0.05$ ; \*\*,  $p < 0.01$ ; two-tailed log-rank test).

**Table S1. Information about the Primary GBM Patients in This Study, [Related to Figure 1.](#)**
